# Supplementary material for: Circulating miRNAs in sepsis—A network under attack: An in-silico prediction of the potential existence of miRNA sponges in sepsis
Source: PubMed Central journal article supplement (PMC5562310; doi:10.1371/journal.pone.0183334), 2017-08-18
Supplement: pone.0183334.s001.pdf [file pone.0183334.s001.pdf]

| Cohorts             | n  | Age (mean, SD and range)   | Female to male ratio |
|---------------------|----|----------------------------|----------------------|
| Sepsis patients     | 99 | 56.26 +/- 14<br>(19-83)    | 58/41                |
| Control group       | 53 | 42.41 +/- 11.7<br>(26-76)  | 25/28                |
| Pre-surgical group  | 19 | 59.29 +/- 11.94<br>(36-80) | 8/11                 |
| Post-surgical group | 11 | 59.16 +/- 12.11<br>(18-77) | 6/5                  |
