# Supplementary material for: Circulating miRNAs in sepsis—A network under attack: An in-silico prediction of the potential existence of miRNA sponges in sepsis
Source: PubMed Central journal article supplement (PMC5562310; doi:10.1371/journal.pone.0183334), 2017-08-18
Supplement: pone.0183334.s002.pdf [file pone.0183334.s002.pdf]

| distance       | strength                | color |
|----------------|-------------------------|-------|
| from 0 to 6    | very powerful connected | red   |
| from >6 to 10  | powerful connected      | blue  |
| from >10 to 20 | medium connected        | green |
| from >20 to 40 | slightly connected      | black |
| from >40 to 80 | poor connected          | black |
| above 80       | very poor connected     | black |
